# Supplementary material
Source: PubMed Central journal article supplement (PMC8149137)
Supplement: NIHMS1678998-supplement-1.pdf [file NIHMS1678998-supplement-1.pdf]

**Appendix Table A. Female and male model fit indices and class prevalence for exploratory latent class analysis in 2015 sample**

| Number of Classes                  | Log-likelihood | Adjusted BIC | AIC   | Entropy | Vuong-Lo-Mendell-Rubin p-value | Class Prevalences (%) |      |      |      |      |     |      |     |  |  |
|------------------------------------|----------------|--------------|-------|---------|--------------------------------|-----------------------|------|------|------|------|-----|------|-----|--|--|
|                                    |                |              |       |         |                                | 1                     | 2    | 3    | 4    | 5    | 6   | 7    | 8   |  |  |
| <b>Female 2015 Sample (N=5055)</b> |                |              |       |         |                                | 100.0                 |      |      |      |      |     |      |     |  |  |
| 1                                  | -27107         | 54279        | 54239 | 1.00    | -                              | 0                     |      |      |      |      |     |      |     |  |  |
| 2                                  | -24509         | 49152        | 49068 | 0.77    | 0.00                           | 28.1                  | 71.9 |      |      |      |     |      |     |  |  |
| 3                                  | -23921         | 48045        | 47918 | 0.80    | 0.00                           | 68.6                  | 10.6 | 20.7 |      |      |     |      |     |  |  |
| 4                                  | -23563         | 47399        | 47228 | 0.76    | 0.00                           | 23.5                  | 12.0 | 58.0 | 6.5  |      |     |      |     |  |  |
| 5                                  | -23329         | 47000        | 46786 | 0.77    | 0.00                           | 57.8                  | 12.7 | 12.0 | 10.0 | 7.5  |     |      |     |  |  |
| 6                                  | -23209         | 46830        | 46572 | 0.76    | 0.00                           | 56.0                  | 13.5 | 4.2  | 9.2  | 11.2 | 5.9 |      |     |  |  |
| 7                                  | -23117         | 46715        | 46413 | 0.79    | 0.00                           | 47.5                  | 9.8  | 14.2 | 9.3  | 4.2  | 9.1 | 5.9  |     |  |  |
| 8                                  | -23050         | 46651        | 46306 | 0.78    | 0.08                           | 10.0                  | 12.8 | 7.2  | 3.8  | 8.3  | 3.3 | 50.4 | 4.3 |  |  |
| <b>Male 2015 Sample (N=2420)</b>   |                |              |       |         |                                | 100.0                 |      |      |      |      |     |      |     |  |  |
| 1                                  | -10726         | 21507        | 21476 | 1.00    | -                              | 0                     |      |      |      |      |     |      |     |  |  |
| 2                                  | -9915          | 19946        | 19881 | 0.76    | 0.00                           | 21.3                  | 78.7 |      |      |      |     |      |     |  |  |
| 3                                  | -9711          | 19597        | 19498 | 0.82    | 0.00                           | 17.8                  | 6.8  | 75.5 |      |      |     |      |     |  |  |
| 4                                  | -9561          | 19357        | 19224 | 0.84    | 0.00                           | 73.5                  | 11.5 | 7.6  | 7.4  |      |     |      |     |  |  |

|   |       |       |           |      |      |      |     |          |     |          |
|---|-------|-------|-----------|------|------|------|-----|----------|-----|----------|
| 5 | -9469 | 19232 | 1906<br>5 | 0.81 | 0.00 | 65.6 | 8.5 | 6.2      | 8.6 | 11.<br>1 |
| 6 | -9429 | 19214 | 1901<br>3 | 0.82 | 0.15 | 64.9 | 8.5 | 11.<br>1 | 8.5 | 3.9<br>2 |

Appendix Figure A.1. Model-estimate, Class Specific Item Probabilities Profile Plot for the Seven-Class Model in the 2015 Women (% of sample)

Appendix Figure A.2. Model-estimate, Class Specific Item Probabilities Profile Plot for the Seven-Class Model in the 2015 Men (% of sample)

**Appendix Table B. Crude and Adjusted Predicted Probabilities of Obesity and Mean BMI by Latent Class in the 2018 Sample**

|                                                                 | Crude |           | Adjusted <sup># +</sup>   |           | Crude                    |           | Adjusted <sup># +</sup>     |           |
|-----------------------------------------------------------------|-------|-----------|---------------------------|-----------|--------------------------|-----------|-----------------------------|-----------|
|                                                                 | Prob  | 95 % CI   | Prob                      | 95 % CI   | BMI (kg/m <sup>2</sup> ) | 95 % CI   | BMI (kg/m <sup>2</sup> )    | 95 % CI   |
| <b>Female</b>                                                   |       |           |                           |           |                          |           |                             |           |
| 1-Low Adversities                                               | 0.10  | 0.09-0.12 | 0.11 <sup>a</sup>         | 0.09-0.12 | 24.2                     | 24.0-24.4 | 24.4 <sup>a</sup>           | 24.2-24.7 |
| 2-Adult Adversities and Household Mental Illness                | 0.11  | 0.05-0.17 | 0.06 <sup>a,b</sup>       | 0.00-0.11 | 25.0                     | 24.2-25.3 | 23.9 <sup>a,b</sup>         | 22.6-24.7 |
| 3-Household Mental Illness                                      | 0.22  | 0.17-0.27 | 0.19 <sup>c</sup>         | 0.14-0.24 | 25.9                     | 25.6-26.5 | 25.5 <sup>c</sup>           | 25.3-26.2 |
| 4- Childhood Emotional Abuse                                    | 0.18  | 0.14-0.22 | 0.17 <sup>c,d</sup>       | 0.13-0.21 | 26.2                     | 25.3-26.8 | 26.1 <sup>c,d</sup>         | 24.3-27.0 |
| 5-Childhood Household Dysfunction and Childhood Emotional Abuse | 0.20  | 0.13-0.26 | 0.15 <sup>a,b,c,d,e</sup> | 0.08-0.21 | 26.3                     | 23.7-27.3 | 25.4 <sup>a,b,c,d,e</sup>   | 24.4-26.6 |
| 6-High Adult Adversities & Low Childhood Adversities            | 0.15  | 0.11-0.19 | 0.17 <sup>c,d,e,f</sup>   | 0.12-0.21 | 24.2                     | 24.7-26.1 | 25.1 <sup>a,b,c,d,e,f</sup> | 25.8-25.9 |
| 7-High Lifetime Adversities                                     | 0.25  | 0.18-0.32 | 0.23 <sup>c,d,e,f</sup>   | 0.16-0.30 | 27.4                     | 28.7      | 27.3 <sup>d</sup>           | -         |
| <b>Male</b>                                                     |       |           |                           |           |                          |           |                             |           |
| 1-Low Adversities                                               | 0.12  | 0.10-0.13 | 0.12 <sup>g</sup>         | 0.09-0.14 | 24.6                     | 24.4-24.9 | 24.6 <sup>g</sup>           | 24.3-25.0 |

|                                                               |      |           |                         |           |      |      |                         |      |
|---------------------------------------------------------------|------|-----------|-------------------------|-----------|------|------|-------------------------|------|
|                                                               |      |           |                         |           |      | 24.1 |                         | 23.8 |
| 2-Childhood Physical & Emotional Abuse                        | 0.15 | 0.09-0.21 | 0.14 <sup>g,h</sup>     | 0.07-0.20 | 24.7 | -    | 24.8 <sup>g,h</sup>     | -    |
| 3-Childhood Household Dysfunction & Childhood Emotional Abuse | 0.21 | 0.13-0.28 | 0.14 <sup>g,h,i</sup>   | 0.07-0.22 | 25.5 | 24.6 | 24.7 <sup>g,h,i</sup>   | 23.6 |
| 4-Intimate Partner Emotional Abuse                            | 0.12 | 0.05-0.18 | 0.12 <sup>g,h,i,j</sup> | 0.05-0.18 | 24.9 | 24.1 | 25.2 <sup>g,h,i,j</sup> | 24.2 |
| 5- Childhood Household Alcohol Abuse                          | 0.22 | 0.16-0.28 | 0.19 <sup>h,i,j</sup>   | 0.12-0.25 | 26.1 | 25.4 | 26.0 <sup>h,i,j</sup>   | 25.1 |
|                                                               |      |           |                         |           |      | 26.9 | 26.9                    | 26.9 |

#race/ethnicity (white vs. POC), parent education & 2/4 year school

a,b,c,d,e,f,g,h,i,j. Values with unlike superscript letters were pairwise comparisons statistically significantly different chi-square p-value. (p-value <0.05)

+ statistically significant overall class differences Wald-test p-value <0.05

**Appendix Table C. Crude and Adjusted Predicted Probabilities of Obesity and Mean BMI by Latent Class in the 2015 Sample**

|                                                      | Crude |           | Adjusted <sup># +</sup>   |           | Crude                    |         | Adjusted <sup># +</sup>   |         |
|------------------------------------------------------|-------|-----------|---------------------------|-----------|--------------------------|---------|---------------------------|---------|
|                                                      | Prob  | 95 % CI   | Prob                      | 95 % CI   | BMI (kg/m <sup>2</sup> ) | 95 % CI | BMI (kg/m <sup>2</sup> )  | 95 % CI |
| <b>Female</b>                                        |       |           |                           |           |                          |         |                           |         |
| 1-Low Adversities                                    | 0.10  | 0.08-0.11 | 0.10 <sup>a</sup>         | 0.08-0.11 | 23.9                     | 23.7    | 24.0 <sup>a</sup>         | 23.7    |
| 2- Lifetime Sexual Assault                           | 0.12  | 0.09-0.16 | 0.12 <sup>a,b</sup>       | 0.09-0.16 | 24.1                     | 24.1    | 24.3 <sup>a,b</sup>       | 24.2    |
| 3-Household Mental Illness                           | 0.15  | 0.12-0.19 | 0.15 <sup>b,c</sup>       | 0.11-0.19 | 25.2                     | 24.8    | 25.1 <sup>b,c</sup>       | 24.5    |
| 4- Childhood Emotional Abuse                         | 0.15  | 0.11-0.19 | 0.14 <sup>a,b,c,d</sup>   | 0.09-0.19 | 25.1                     | 25.2    | 25.1 <sup>b,c,d</sup>     | 25.6    |
| 5-Household Dysfunction and Child Emotional Abuse    | 0.26  | 0.19-0.34 | 0.24 <sup>e</sup>         | 0.16-0.32 | 27.1                     | 24.6    | 27.0 <sup>e</sup>         | 24.3    |
| 6-High Adult Adversities & Low Childhood Adversities | 0.13  | 0.09-0.16 | 0.12 <sup>a,b,c,d,f</sup> | 0.08-0.16 | 24.5                     | 24.0    | 24.4 <sup>a,b,c,d,f</sup> | 25.9    |
| 7-High Adversities                                   | 0.24  | 0.18-0.29 | 0.20 <sup>c,d,e</sup>     | 0.14-0.25 | 26.2                     | 25.4    | 25.5 <sup>c,d,e,f</sup>   | 25.8    |

| Male                                            | Crude |               | Adjusted <sup>#</sup>   |               | 27.1  |                       | 26.6                    |                       |
|-------------------------------------------------|-------|---------------|-------------------------|---------------|-------|-----------------------|-------------------------|-----------------------|
|                                                 | Crude | 0.10-<br>0.13 | Adjusted <sup>#</sup>   | 0.10-<br>0.14 | Crude | Adjusted <sup>#</sup> | Crude                   | Adjusted <sup>#</sup> |
| 1-Low Adversities                               | 0.11  | 0.13          | 0.12 <sup>g</sup>       | 0.14          | 24.5  | 24.7                  | 24.6 <sup>g</sup>       | 24.9                  |
| 2-Childhood Emotional Abuse                     | 0.13  | 0.07-<br>0.19 | 0.10 <sup>g,h</sup>     | 0.04-<br>0.15 | 24.3  | 25.0                  | 23.9 <sup>g,h</sup>     | 24.8                  |
| 3-Household Dysfunction & Child Emotional Abuse | 0.19  | 0.12-<br>0.26 | 0.18 <sup>g,h,i</sup>   | 0.11-<br>0.26 | 25.6  | 26.6                  | 25.6 <sup>g,i</sup>     | 26.7                  |
| 4-Intimate Partner Emotional Abuse              | 0.11  | 0.06-<br>0.16 | 0.09 <sup>g,h,i,j</sup> | 0.04-<br>0.14 | 24.4  | 25.1                  | 24.2 <sup>g,h,j</sup>   | 24.9                  |
| 5-Household Mental Illness                      | 0.17  | 0.11-<br>0.23 | 0.15 <sup>g,h,i,j</sup> | 0.09-<br>0.20 | 25.7  | 26.4                  | 25.5 <sup>g,h,i,j</sup> | 26.5                  |

<sup>#</sup>race/ethnicity (white vs. POC), parent education & 2/4 year school

<sup>a,b,c,d,e,f,g,h,i,j</sup> Values with unlike superscript letters were pairwise comparisons statistically significantly different chi-square p-value. (P value <0.05)

+ statistically significant overall class differences Wald-test p-value <0.05
